# Synergistic Inhibition of $\beta_2$ -adrenergic Receptor-mediated Alveolar Epithelial Fluid Transport by Interleukin-8 and Transforming Growth Factor- $\beta$

Brant M. Wagener, M.D., Ph.D., Jérémie Roux, Ph.D., Michel Carles, M.D., Ph.D., Jean-Francois Pittet, M.D.

## ABSTRACT

**Background:** Patients with acute respiratory distress syndrome who retain maximal alveolar fluid clearance (AFC) have better clinical outcomes. The release of endogenous catecholamines associated with shock or the administration of  $\beta_2$ -adrenergic receptor ( $\beta_2$ AR) agonists enhances AFC *via* a 3'-5'-cyclic adenosine monophosphate-dependent mechanism. The authors have previously reported that transforming growth factor- $\beta$ 1 (TGF- $\beta$ 1) and interleukin-8 (IL-8), two major mediators of alveolar inflammation associated with the early phase of acute respiratory distress syndrome, inhibit AFC upregulation by  $\beta_2$ AR agonists *via* a phosphoinositol-3-kinase (PI3K)-dependent mechanism. However, whether TGF- $\beta$ 1 and IL-8 cause an additive or synergistic inhibition of AFC is unclear. Thus, the central hypothesis of the study was to determine whether they synergistically inhibit the  $\beta_2$ AR-stimulated AFC by activating two different isoforms of PI3K.

**Methods:** The effects of TGF- $\beta$ 1 or IL-8 on  $\beta_2$ AR agonist-stimulated net alveolar fluid transport were studied using short-circuit current studies. Molecular pathways of inhibition were confirmed by pharmacologic inhibitors and Western blotting of p-Akt, G-protein-coupled receptor kinase 2, protein kinase C- $\zeta$ , and phospho- $\beta_2$ AR. Finally, our observations were confirmed by an *in vivo* model of AFC.

**Results:** Combined exposure to TGF- $\beta$ 1 and IL-8/cytokine-induced neutrophil chemoattractant-1 caused synergistic inhibition of  $\beta_2$ AR agonist-stimulated vectorial  $\text{Cl}^-$  across alveolar epithelial type II cells ( $n = 12$  in each group). This effect was explained by activation of different isoforms of PI3K by TGF- $\beta$ 1 and IL-8/cytokine-induced neutrophil chemoattractant-1 ( $n = 12$  in each group). Furthermore, the inhibitory effect of TGF- $\beta$ 1 on 3'-5'-cyclic adenosine monophosphate-stimulated alveolar epithelial fluid transport required the presence of IL-8/cytokine-induced neutrophil chemoattractant-1 ( $n = 12$  in each group). Inhibition of cytokine-induced neutrophil chemoattractant-1 prevented TGF- $\beta$ 1-mediated heterologous  $\beta_2$ AR downregulation and restored physiologic  $\beta_2$ AR agonist-stimulated AFC in rats ( $n = 6$  in each group).

**Conclusions:** TGF- $\beta$ 1 and IL-8 have a synergistic inhibitory effect on  $\beta_2$ AR-mediated stimulation of pulmonary edema removal by the alveolar epithelium. This result may, in part, explain why a large proportion of the patients with acute respiratory distress syndrome have impaired AFC. (**ANESTHESIOLOGY** 2015; 122:1084-92)

**A**CUTE respiratory distress syndrome (ARDS) is a clinical syndrome manifested by the rapid onset of respiratory failure associated with high mortality.<sup>1</sup> ARDS is characterized by increased permeability of the alveolar-capillary barrier, decreased surfactant function, and impaired alveolar fluid clearance (AFC).<sup>2</sup> Importantly, a minority of patients with ARDS who retain maximal AFC have better clinical outcomes.<sup>3</sup> Endogenous and exogenously administered  $\beta_2$ -adrenergic receptor ( $\beta_2$ AR) agonists have been shown to enhance alveolar epithelial fluid transport under physiological conditions<sup>4-7</sup> and removal of pulmonary edema in experimental models of lung injury,<sup>8-10</sup> as well as in one prospective study of extravascular lung water in ARDS patients.<sup>11</sup> However, two recent phase III multicenter trials that tested the effect of  $\beta_2$ -adrenergic agonist

### What We Already Know about This Topic

- Alveolar fluid clearance is enhanced by  $\beta_2$ -adrenoceptor activation, associated with better outcomes in patients with acute respiratory distress syndrome
- Inflammatory mediators interleukin-8 and transforming growth factor- $\beta$ 1 inhibit this enhancement, but whether they interact additively or synergistically is unknown

### What This Article Tells Us That Is New

- In human and rat alveolar epithelial cells, combined exposure to interleukin-8 and transforming growth factor- $\beta$ 1 synergistically inhibited  $\beta_2$ -adrenergic agonist-mediated  $\text{Cl}^-$  transport, important to fluid removal

therapy to increase AFC in patients with ARDS were stopped for futility.<sup>12,13</sup>

Supplemental Digital Content is available for this article. Direct URL citations appear in the printed text and are available in both the HTML and PDF versions of this article. Links to the digital files are provided in the HTML text of this article on the Journal's Web site ([www.anesthesiology.org](http://www.anesthesiology.org)). Drs. Wagener and Roux contributed equally to this manuscript.

Submitted for publication January 19, 2014. Accepted for publication December 11, 2014. From the Department of Anesthesiology, University of Alabama at Birmingham, Birmingham, Alabama (B.M.W.); Institute of Research on Cancer and Ageing, University of Nice-Sophia-Antipolis, Nice, France (J.R.); Department of Anesthesiology, University of Nice-Sophia-Antipolis, Nice, France (M.C.); and Departments of Anesthesiology, Surgery and Cell Developmental and Integrative Biology, University of Alabama at Birmingham, Birmingham, Alabama (J.-F.P.).

Copyright © 2015, the American Society of Anesthesiologists, Inc. Wolters Kluwer Health, Inc. All Rights Reserved. *Anesthesiology* 2015; 122:1084-92

Although the reasons for the lack of success of these phase III clinical trials are likely multifactorial, we have recently reported that two inflammatory mediators, interleukin-8 (IL-8) (that is also called chemokine [C-X-C motif] ligand 1 [CXCL1] in the new National Center for Biotechnology Information database) and transforming growth factor- $\beta$ 1 (TGF- $\beta$ 1) that play an important role in the pathogenesis of the early phase of ARDS,<sup>14–22</sup> inhibit epinephrine-dependent and cyclic adenosine monophosphate (cAMP)–mediated net fluid transport across rat alveolar epithelial type II (ATII) cell monolayers, as well as epinephrine-dependent AFC in a rat model of hemorrhagic shock *via* a phosphoinositol-3-kinase (PI3K)–dependent mechanism.<sup>23,24</sup> However, whether TGF- $\beta$ 1 and IL-8 would cause an additive or synergistic inhibition of AFC are still unclear. Thus, the central hypothesis of the study was to determine whether both mediators could synergistically inhibit the  $\beta_2$ AR-stimulated AFC by activating two different isoforms of PI3K. If confirmed, these results could, in part, explain why a large proportion of the patients with ARDS have impaired AFC.

## Materials and Methods

In the following section, there are some methods that are abbreviated for simplicity. A more complete description of these methods can be found in Supplemental Digital Content 1, <http://links.lww.com/ALN/B132>.

### Reagents

All cell culture media were prepared in the Pittet Laboratory at the University of Alabama at Birmingham using deionized water and analytical grade reagents. (–) [125I] iodocyanopindolol was purchased from PerkinElmer (Waltham, MA). The PI3K isoform inhibitors, sw-14, PW12, and AS-605240, were provided by Ben Houseman, M.D., Ph.D. (University of California, San Francisco, San Francisco, California). IL-8 and cytokine-induced neutrophil chemoattractant-1 (CINC-1) enzyme-linked immunosorbent assay were purchased from R&D Systems (Minneapolis, MN). Human recombinant TGF- $\beta$ 1 was obtained from R&D Systems. Antibodies and phosphoantibodies for the  $\beta_2$ AR and protein kinase C-zeta (PKC- $\zeta$ ) were purchased from Santa Cruz Biotechnology (Santa Cruz, CA). Antibodies and phosphoantibodies for Akt were purchased from Calbiochem (San Diego, CA). Goat anti-mouse and goat anti-rabbit IRDye®-conjugated secondary antibodies were purchased from LI-COR Biosciences (Lincoln, NE). Protein concentration of cell lysates was determined using the Bio-Rad protein assay kit (Bio-Rad, Hercules, CA). Soluble chimeric TGF- $\beta$  type II receptor was a generous gift from Gerald Horan, Ph.D. (Biogen Idec, Cambridge, MA). CINC-1 blocking antibody and immunoglobulin G isotype control antibody were purchased from R&D Systems. All other reagents were obtained from Sigma (St. Louis, MO).

### Cell Culture

Primary cultures of rat and human alveolar epithelial cells were used for the *in vitro* studies. ATII cells were isolated as previously described.<sup>25,26</sup>

Following approval of the University of California, San Francisco Committee on Human Research, human alveolar epithelial type II cells were isolated using a modification of methods previously described.<sup>27</sup>

### Short-circuit Current Studies of Rat and Human ATII Cell Monolayers

Short-circuit current studies were performed as described previously.<sup>24</sup>

### Isolation of Plasma Membrane-enriched Fraction

Isolation of plasma membrane-enriched fraction was performed as described previously.<sup>24</sup>

### Saturation Binding Experiments

Saturation binding experiments were performed as described previously.<sup>24</sup>

### Western Blot Analyses

Western blot analyses from cells homogenates were performed as described previously.<sup>24</sup>

### CINC-1 Enzyme-linked Immunosorbent Assay

CINC-1 levels in cell culture supernatant from ATII cell monolayers were measured by an enzyme-linked immunosorbent assay purchased from R&D Systems following the manufacturer's instructions.

### Cell Viability

The cell viability after exposure to different experimental conditions was measured by the Alamar Blue assay (Invitrogen, Grand Island, NY).<sup>28</sup> The cell media were replaced by medium containing 10% Alamar Blue and placed at 37°C in the cell incubator for 2 to 3 h. The medium was then collected and read on a plate reader at 570 nm.

### Rat Studies

The protocol for the measurement of AFC in rats was approved by the University of California, San Francisco, Committee on Animal Research, and was performed as previously described.<sup>24,29</sup> Sample sizes were chosen based on previous experience, and randomization and blinding methods were not feasible for these experiments.

### Statistical Analysis

All normal data are summarized as mean  $\pm$  SD. Nonparametric data were summarized as mean  $\pm$  interquartile range. For the statistical analysis, we used StatView 5.0® (SAS Inc., Cary, NC) and MedCalc® 7.2.0.2 (MedCalc Software Inc., Ostend, Belgium). The normal distribution was verified using the Agostino–Pearson test. For normally distributed

data, one-way ANOVA followed by a Dunnett test was used to compare three or more experimental groups and a Student *t* test to compare two experimental groups. Bonferroni correction, controlling for false-positive error rate, was used to adjust for multiple comparisons. Nonparametric data were compared with a Kruskal–Wallis test followed by a Tukey *post hoc* test. A *P* value of less than 0.05 was considered statistically significant. Saturation binding experiments were analyzed by nonlinear regression. The maximal number of iodocyanopindolol-binding sites ( $B_{max}$ ) and the equilibrium dissociation constant ( $K_D$ ) were calculated from saturation binding curves by nonlinear least squares curve fittings for one binding site. The goodness of fit was determined by the F ratio test. All statistical comparison of means was bilateral (two-tailed tests).

## Results

### **CINC-1 and TGF- $\beta$ 1 Act Synergistically to Decrease $\beta_2$ AR Agonist-stimulated $Cl^-$ Transport across Primary Rat ATII Cell Monolayers**

Low doses (1 ng/ml) of CINC-1 (the rat homolog of IL-8) and TGF- $\beta$ 1, individually, did not inhibit epinephrine-dependent  $Cl^-$  transport across primary rat ATII cell monolayers. However, when CINC-1 and TGF- $\beta$ 1 (1 ng/ml) were added concomitantly to the cell medium, there was a statistically significant decrease in epinephrine-dependent  $Cl^-$  transport across primary rat ATII cell monolayers (fig. 1A). In contrast, using larger doses (10 ng/ml) of CINC-1 or TGF- $\beta$ 1 that we have previously shown to individually cause the maximal inhibitory effect of these inflammatory mediators on epinephrine-dependent  $Cl^-$  transport across primary rat ATII cell monolayers<sup>23,24</sup> did not result in an additive or synergistic inhibitory effect of epinephrine-dependent  $Cl^-$  transport (fig. 1B). Cell viability measured by Alamar Blue was not decreased by exposure

to IL-8/CINC-1 or TGF- $\beta$ 1 (data not shown). These results indicate that there is a synergistic inhibitory effect of IL-8/CINC-1 and TGF- $\beta$ 1 on epinephrine-dependent  $Cl^-$  transport across primary rat ATII cell monolayers. However, these data also suggest that these inflammatory mediators may activate the same cell signaling pathway(s) to inhibit the  $\beta_2$ AR agonist-stimulated  $Cl^-$  transport across these cell monolayers.

### **CINC-1 and TGF- $\beta$ 1 Decrease $\beta_2$ AR Agonist-stimulated $Cl^-$ Transport across Primary Rat ATII Cell Monolayers via Different Isoforms of PI3K**

In our previous studies,<sup>23,24</sup> we demonstrated that CINC-1- and TGF- $\beta$ 1-mediated decrease in  $\beta_2$ AR agonist-stimulated  $Cl^-$  transport occurred *via* activation of PI3K by using a pharmacologic inhibitor that blocked all isoforms of PI3K (PIK-90). To determine whether these two mediators could activate different isoforms of PI3K, we exposed ATII cell monolayers to PW12 and sw-14 (or AS-605240 which had to be used after our stock of sw-14 was depleted) to inhibit PI3K $\alpha$  and PI3K $\gamma$ , respectively, before treating them with TGF- $\beta$ 1 or CINC-1, respectively. sw-14, but not PW12, inhibited Akt phosphorylation by CINC-1, a protein phosphorylated by the activation of the PI3K signaling pathway (fig. 2A), whereas PW12, but not sw-14, inhibited Akt phosphorylation by TGF- $\beta$ 1 (fig. 2B), indicating differential activation of PI3K isoforms by the respective mediators. Furthermore, AS-605240, but not PW12, reversed CINC-1-mediated decrease in epinephrine-dependent  $Cl^-$  transport (fig. 2C) and PW12, but not sw-14, rescued TGF- $\beta$ 1-mediated inhibition of epinephrine-dependent  $Cl^-$  transport (fig. 2D). Taken together, these results indicate that CINC-1-mediated inhibition of  $Cl^-$  transport is PI3K $\gamma$ -dependent, whereas TGF- $\beta$ 1-mediated inhibition is PI3K $\alpha$ -dependent.

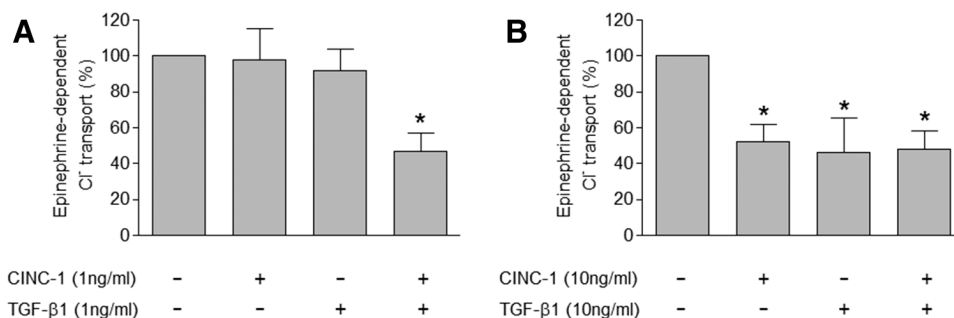

**Fig. 1.** Cytokine-induced neutrophil chemokine (CINC)-1 and transforming growth factor (TGF)- $\beta$ 1 cause a synergistic inhibition of  $\beta_2$ AR agonist-stimulated cystic fibrosis transmembrane conductance regulator (CFTR)-specific  $Cl^-$  transport across rat type II alveolar (ATII) cell monolayers. (A) Coexposure of rat ATII cell monolayers to a small dose (1 ng/ml for 6 h) of CINC-1 and TGF- $\beta$ 1 causes a synergistic inhibition of the epinephrine-stimulated CFTR-specific  $Cl^-$  absorption across the apical membrane of these cells while single exposure to 1 ng/ml of CINC-1 or TGF- $\beta$ 1 has no effect. (B) Coexposure of rat ATII cell monolayers to a dose (10 ng/ml for 6 h) of CINC-1 and TGF- $\beta$ 1 does not increase the inhibitory effect of single exposure of the same dose of CINC-1 and TGF- $\beta$ 1 on the epinephrine-stimulated CFTR-specific  $Cl^-$  absorption across the apical membrane of rat ATII cell monolayers. For all experiments, mean basal short-circuit current was  $-7 \pm 1.8 \mu A$ , mean epinephrine-treated short-circuit current was  $-24 \pm 2.4 \mu A$ . The results are means  $\pm$  SD (*n* = 12); \**P* < 0.05 from controls.

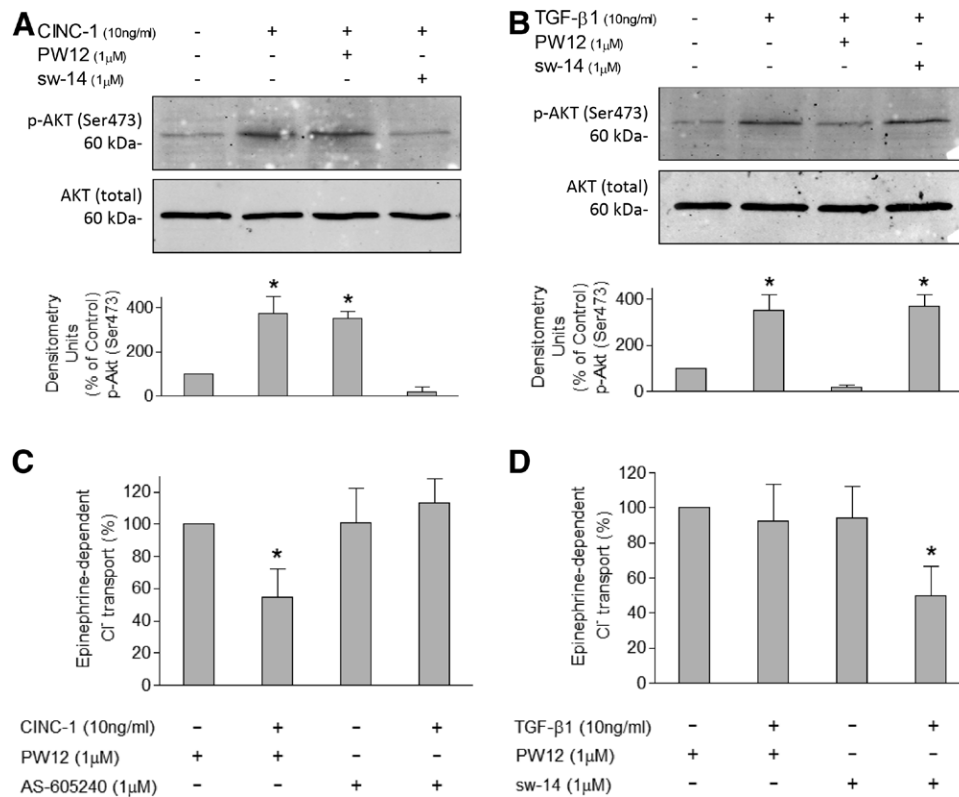

**Fig. 2.** Cytokine-induced neutrophil chemokine (CINC)-1 and transforming growth factor (TGF)- $\beta$ 1 decrease  $\beta_2$ -adrenergic receptor agonist-stimulated Cl<sup>-</sup> transport across rat type II alveolar (ATII) cells via the activation of different phosphoinositide 3 (PI3)-kinase isoforms. (A, B) Short exposure to CINC-1 or TGF- $\beta$ 1 induces phosphorylation of Akt in rat ATII cells via the activation of different PI3K isoforms (PI3K $\alpha$  for TGF- $\beta$ 1 and PI3K $\gamma$  for CINC-1). Densitometry analysis results are means  $\pm$  SEM (n = 4); \* $P$  < 0.05 from controls. (C, D) Pretreatment with specific inhibitors of different PI3-kinase isoforms (PI3K $\alpha$  for TGF- $\beta$ 1 and PI3K $\gamma$  for CINC-1) prevents CINC-1- or TGF- $\beta$ 1-induced inhibition of the epinephrine-stimulated Cl<sup>-</sup> transport across the apical membrane of rat ATII cells. For all experiments, the results are means  $\pm$  SD (n = 12); \* $P$  < 0.05 from controls.

#### **Inhibition of Endogenous CINC-1 Prevents TGF- $\beta$ 1-mediated Inhibition of $\beta_2$ AR Agonist-stimulated Cl<sup>-</sup> Transport across Primary Rat and Human ATII Cell Monolayers and AFC in an In Vivo Model of AFC in Rat**

IL-8/CINC-1 is a signaling molecule that is secreted by numerous cell types.<sup>30,31</sup> We found that it was indeed present in the supernatant of primary rat ATII cells and was not increased by stimulation of cell monolayers with TGF- $\beta$ 1 (fig. 3). We further found that the amount of secreted CINC-1 was sufficient to act synergistically with TGF- $\beta$ 1 to inhibit  $\beta_2$ AR signaling in ATII cells. Indeed, pretreatment with CINC-1- or IL-8-blocking antibodies in rat and human ATII cells, respectively, prevented TGF- $\beta$ 1-mediated inhibition of epinephrine-dependent Cl<sup>-</sup> transport across rat ATII cell monolayers (fig. 4, A and B). In contrast, inhibition of endogenous TGF- $\beta$ 1 by soluble chimeric TGF- $\beta$  type II receptor did not prevent the CINC-1-mediated inhibition of epinephrine-dependent Cl<sup>-</sup> transport across rat ATII cell monolayers (data not shown). Finally, we also found that pretreatment with CINC-1-blocking antibody reversed TGF- $\beta$ 1-mediated inhibition of epinephrine-dependent AFC in rat (fig. 5). Taken together, these data indicate that the release of

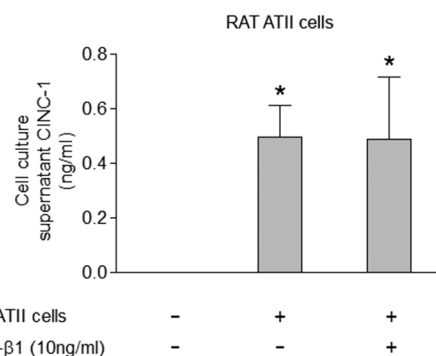

**Fig. 3.** Basal release of cytokine-induced neutrophil chemokine (CINC)-1 by rat type II alveolar (ATII) cell monolayers is not affected by prior exposure to transforming growth factor (TGF)- $\beta$ 1. There is a basal release of CINC-1 by rat ATII cell monolayers that is not affected by exposure to TGF- $\beta$ 1 (10ng/ml for 6 h). CINC-1 was not detected in the cell medium containing 10% fetal bovine serum. The results are means  $\pm$  SD (n = 8). \* $P$  < 0.05 from controls.

endogenous IL-8/CINC-1 by ATII cells or other cell types is required for the TGF- $\beta$ 1-mediated inhibition of epinephrine-dependent net alveolar fluid transport.



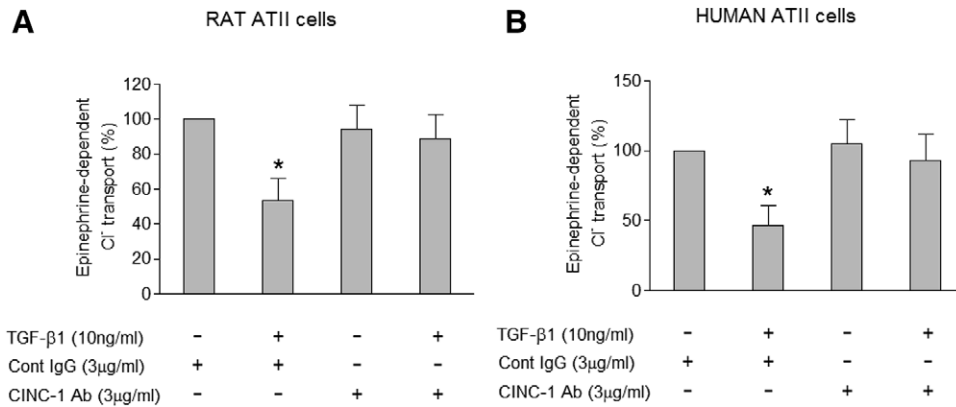

**Fig. 4.** Cytokine-induced neutrophil chemokine (CINC)-1 blockade prevents transforming growth factor (TGF)- $\beta$ 1-mediated inhibition of  $\beta_2$ -adrenergic receptor agonist-stimulated alveolar net fluid transport across primary rat (A) and human (B) type II alveolar (ATII) cell monolayers. Pretreatment with a blocking antibody to CINC-1 but not with its isotype control antibody prevents TGF- $\beta$ 1-induced inhibition of the epinephrine-stimulated Cl<sup>-</sup> transport across the apical membrane of rat or human ATII cells. For all experiments, the results are means  $\pm$  SD ( $n = 12$ ); \* $P < 0.05$  from controls.

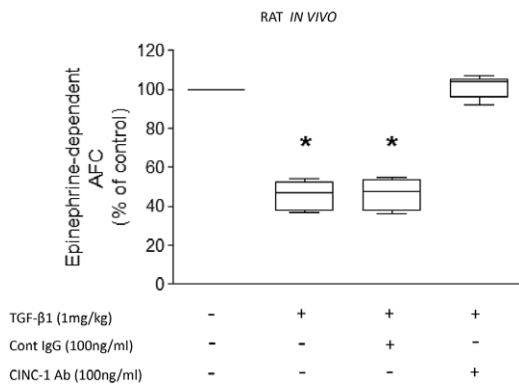

**Fig. 5.** Cytokine-induced neutrophil chemokine (CINC)-1 blockade prevents transforming growth factor (TGF)- $\beta$ 1-mediated inhibition of the epinephrine-stimulated alveolar fluid clearance (AFC) in rats. Pretreatment with a blocking antibody to CINC-1 but not with its isotype control antibody prevents TGF- $\beta$ 1-induced inhibition of the epinephrine-stimulated AFC in rats (AFC control  $7.1\% \pm 1.3/30$  min, epinephrine-treated  $14.2\% \pm 1.3/30$  min). Results are means  $\pm$  interquartile range ( $n = 6$  in each group); \* $P < 0.05$  from controls. Cont = control; IgG = immunoglobulin G.

#### Inhibition of Endogenous CINC-1 Reverses TGF- $\beta$ 1-mediated Heterologous Desensitization and Downregulation of the $\beta_2$ AR at the Cell Membrane

We have previously reported that both CINC-1 and TGF- $\beta$ 1 are capable of mediating recruitment of G-protein-coupled receptor kinase 2 (GRK2) to the cell membrane and thus cause heterologous desensitization and downregulation of the  $\beta_2$ AR. To explain the mechanism by which the secretion of endogenous CINC-1 is required for the inhibitory effect of TGF- $\beta$ 1 on epinephrine-dependent net alveolar fluid transport, we first measured  $\beta_2$ AR density at the cell membrane of ATII cells by saturation binding experiments. We found that TGF- $\beta$ 1-mediated decrease in cell membrane  $\beta_2$ AR density was inhibited by pretreatment with a CINC-1-blocking antibody (fig. 6). Second, we tested

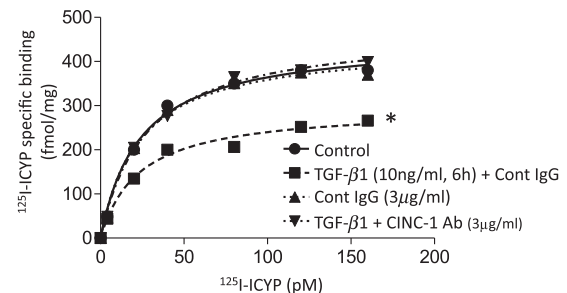

**Fig. 6.** Cytokine-induced neutrophil chemokine (CINC)-1 blockade prevents transforming growth factor (TGF)- $\beta$ 1-mediated downregulation of  $\beta_2$ -adrenergic receptor ( $\beta_2$ AR) on rat type II alveolar cells. Pretreatment with a blocking antibody to CINC-1 but not with its isotype control antibody prevents TGF- $\beta$ 1-mediated decrease in  $\beta_2$ AR cell membrane density, measured by saturation binding experiments ([125I] iodocyanopindolol, [125I]-ICYP) ( $n = 6$ ). For all experiments, the results are means  $\pm$  SD; \* $P < 0.05$  from controls. Cont = control; IgG = immunoglobulin G.

the hypothesis that IL-8/CINC-1, but not TGF- $\beta$ 1, would induce the phosphorylation of PKC- $\zeta$ , a kinase that needs to be activated in order for GRK2 to form a complex with PI3K that then translocates to the cell membrane of ATII cells and inhibits  $\beta_2$ AR signaling in these cells.<sup>23,32</sup> We found that there was a statistically significant increase in phosphorylation of PKC- $\zeta$  above untreated cells in primary rat ATII cell monolayers exposed to CINC-1 (10 ng/ml, 30 min), but not to TGF- $\beta$ 1 (10 ng/ml, 30 min) (fig. 7, A and B). Taken together, these data indicate that IL-8/CINC-1, but not TGF- $\beta$ 1, causes the activation of PKC- $\zeta$  and may explain why the presence of this chemokine is required for the inhibitory effect of TGF- $\beta$ 1 on  $\beta_2$ AR agonist-mediated net AFC.

#### Discussion

In this study, we demonstrate (1) that there is a synergistic effect between low doses (1 ng/ml) of CINC-1 and TGF- $\beta$ 1 in inhibiting  $\beta_2$ AR agonist-stimulated, cAMP-mediated net

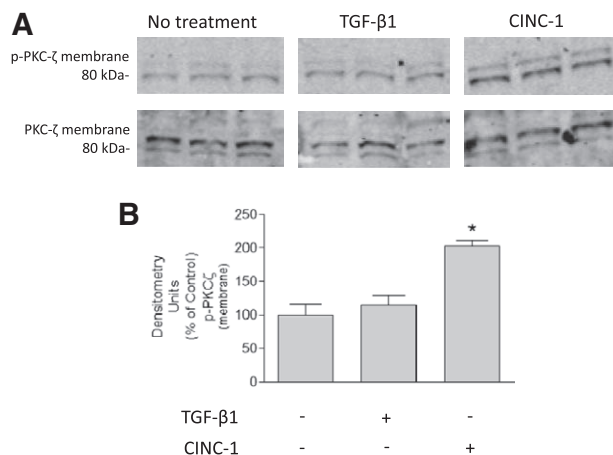

**Fig. 7.** Cytokine-induced neutrophil chemokine (CINC)-1 but not transforming growth factor (TGF)- $\beta$ 1 activates protein kinase C-zeta (PKC- $\zeta$ ) in rat type II alveolar cell monolayers. (A) Treatment with CINC-1 (10 ng/ml for 30 min), but not TGF- $\beta$ 1 (10 ng/ml for 30 min), leads to increased phosphorylation of membrane-bound PKC- $\zeta$ . (B) Normalized phospho-PKC- $\zeta$ /PKC- $\zeta$  ratios determined by densitometry analysis from bands in part A ( $n = 3$ ). For all experiments, the results are means  $\pm$  SD; \* $P < 0.05$  from controls.

alveolar fluid transport across cell monolayers and AFC *in vivo* that is explained by the activation of two different PKC isoforms by these two mediators; (2) that IL-8/CINC-1, but not TGF- $\beta$ 1, causes the activation of PKC- $\zeta$  and GRK2 and may explain why the presence of this chemokine is required for the inhibitory effect of TGF- $\beta$ 1 on  $\beta_2$ AR agonist-mediated net AFC.

Stimulation of net alveolar fluid transport is necessary to clear edema in patients with ARDS.<sup>3,33</sup> Previous experimental and some clinical evidence indicate that cAMP-mediated stimulation of AFC by endogenous catecholamines or by the administration of  $\beta_2$ AR agonists is an important mechanism in the resolution of pulmonary edema.<sup>4,6,10,11,33,34</sup> Despite large increases in endogenous catecholamine release secondary to shock states, impaired AFC is present in roughly 80% of patients with ARDS.<sup>3</sup> In addition, two placebo-controlled phase III clinical trials using  $\beta_2$ -adrenergic agonists in patients with ARDS were stopped for futility. Unfortunately,  $\beta_2$ AR agonists did not reduce ventilator-free days or mortality in patients with ARDS.<sup>12,13</sup>

Although the reasons for the lack of success of these two phase III clinical trials are likely multifactorial, a possible mechanism to explain inhibition of  $\beta_2$ AR-mediated AFC stimulation could be the alveolar release of inflammatory mediators during the acute phase of ARDS. Among these mediators, IL-8 and TGF- $\beta$ 1 have been shown to be critical mediators of the early phase of ARDS in humans. Indeed, IL-8 is increased in the bronchoalveolar lavage fluid and pulmonary edema fluid of patients with ARDS and is a strong predictor of morbidity and mortality.<sup>14–18</sup> Interestingly, impairment of AFC observed during respiratory syncytial virus lung infection in mice was caused by decreased

response to  $\beta_2$ AR agonists. This decreased response was mediated by KC, the murine homolog of IL-8, and reversed *via* inhibition of either KC or its receptor CXCR2.<sup>32</sup> IL-8 blockade also significantly attenuates lung injury caused by ischemia-reperfusion injury, smoke inhalation, or acid aspiration.<sup>35–37</sup> Finally, we previously reported that the rate of AFC was inversely related to the levels of IL-8 in the undiluted pulmonary edema fluid obtained at the time of endotracheal intubation in ARDS patients, suggesting that IL-8 may play a role in reducing alveolar epithelial fluid transport in patients with ARDS.<sup>23</sup> TGF- $\beta$ 1, another inflammatory mediator that is released within the airspaces during the early phase of ARDS,<sup>19–22</sup> is known to inhibit  $\beta_2$ AR messenger ribonucleic acid expression and cAMP-mediated vectorial fluid transport.<sup>38–42</sup>

In previous studies from our laboratory, we found that the mechanisms leading to the inhibition of  $\beta_2$ AR agonist-mediated AFC by IL-8/CINC-1 and TGF- $\beta$ 1 include inhibition of  $\beta_2$ AR agonist-mediated net alveolar fluid transport by recruiting GRK2 to the cell membrane, inducing heterologous desensitization and downregulation of the  $\beta_2$ AR.<sup>23,24</sup> Both mechanisms are PI3K-dependent. In the present study, we tested the hypothesis that both inflammatory mediators added at the same time could have an additive or synergistic effect on the inhibition of the cAMP-stimulated alveolar fluid transport at concentrations that did not have any effect when used individually. We found indeed that there was a synergistic effect between low doses (1 ng/ml) of CINC-1 and TGF- $\beta$ 1 in inhibiting  $\beta_2$ AR agonist-stimulated, cAMP-mediated net alveolar fluid transport across cell monolayers and AFC *in vivo*. Interestingly, using higher doses (10 ng/ml) of both mediators that provide the maximal inhibitory effect for each mediator when used individually did not show any additional additive or synergistic inhibition of the  $\beta_2$ AR signaling in ATII cell monolayers. These results suggest that both mediators may activate similar cell signaling pathway(s) to inhibit  $\beta_2$ AR signaling in the alveolar epithelium, but possibly *via* different isoforms of the same protein(s), as suggested by previously published studies.<sup>43,44</sup> Thus, we examined the effect of these mediators on the activation of several isoforms of that kinase and found that IL-8 activates the gamma isoform of PI3K while TGF- $\beta$ 1 activates the alpha isoform of that kinase. These results may, in part, explain why a large percentage of patients with ARDS secondary to septic or hemorrhagic shock have a reduced AFC early after onset of the syndrome,<sup>3,33</sup> despite the release into the bloodstream of large amount of endogenous catecholamines that we and others have shown to increase AFC rate by several folds in animal models of septic or hemorrhagic shock.<sup>10,45</sup>

Because the heterologous desensitization and downregulation of the  $\beta_2$ AR by either IL-8/CINC-1 or TGF- $\beta$ 1 required the activation of both GRK2 and PI3K in ATII cells, the second aim of the study was to determine whether the presence of either IL-8/CINC-1 or TGF- $\beta$ 1 was required for the observed inhibition of the alveolar epithelial

$\beta_2$ AR cell signaling by the other inflammatory mediator. The results showed that CINC-1 was secreted at baseline by ATII cells and that TGF- $\beta$ 1-mediated inhibition of the *in vitro* epinephrine-dependent alveolar fluid transport and *in vivo* AFC was reversible with pretreatment with CINC-1-blocking antibody. Furthermore, TGF- $\beta$ 1-mediated downregulation of the  $\beta_2$ AR were prevented with pretreatment with a CINC-1-blocking antibody. In contrast, pretreatment of ATII cells with a chimeric soluble TGF- $\beta$ 1 type II receptor that we have previously shown to efficiently inhibit TGF- $\beta$ 1 signaling in ATII cells<sup>24</sup> did not prevent the inhibitory effect of IL-8/CINC-1 on  $\beta_2$ AR signaling in ATII cells.

Because we had shown that both IL-8/CINC-1 and TGF- $\beta$ 1 activate PI3K signaling *via* two different isoforms of this kinase, we then tested the hypothesis that IL-8/CINC-1, but not TGF- $\beta$ 1, would cause the phosphorylation of PKC- $\zeta$ , a kinase that needs to be activated in order for GRK2 to form a complex with PI3K that then translocates to the cell membrane of ATII cells and inhibits  $\beta_2$ AR signaling in these cells. Indeed, the data showed that CINC-1, but not TGF- $\beta$ 1, phosphorylated PKC- $\zeta$  in rat primary ATII cells. Thus, these results explain why CINC-1 blockade prevented the TGF- $\beta$ 1-mediated inhibition of the  $\beta_2$ AR signaling pathway, whereas the inhibition of TGF- $\beta$ 1 signaling did not prevent the effect of IL-8/CINC-1 on that signaling pathway. The schematic representation in figure 8 summarizes the findings of the present study by showing first that IL-8/CINC-1 and TGF- $\beta$ 1 activate two different isoforms of PI3K and second that IL-8/CINC-1, but not TGF- $\beta$ 1, activates both GRK2 and PI3K, an activation that is required for the inhibition of  $\beta_2$ AR agonist-stimulated, cAMP-mediated AFC.

The present study has several limitations. First, our data are mostly from *in vitro* experiments that will require *in vivo* confirmation in humans, although we have reported preliminary data indicating that the rate of AFC is inversely related to the levels of IL-8 in the undiluted pulmonary edema fluid obtained during the early phase of ARDS.<sup>23</sup> Second, the timing and kinetics of the release of IL-8 and TGF- $\beta$ 1 within the airspaces of the lung after onset of ARDS are not fully understood and could play an important role regarding the synergistic AFC inhibition by these two inflammatory mediators. Finally, there are other potential explanations for the lack of success of the two phase III trial with  $\beta_2$ AR agonist treatment to ARDS patients.<sup>12,13</sup> Indeed, inadequate aerosol delivery of the  $\beta_2$ AR agonist, alveolar epithelial damage and agonist-induced downregulation of the  $\beta_2$ AR, could in part explain these negative results.<sup>46,47</sup>

### Clinical Implications and Conclusion

The results presented in this study have some important clinical implications. Indeed, the majority (up to 80%) of the patients with ARDS have an impaired AFC, despite the release of large amount of endogenous catecholamines associated with septic and hemorrhagic shock or clinical illness.<sup>3</sup> The mechanisms of the AFC inhibition are not well

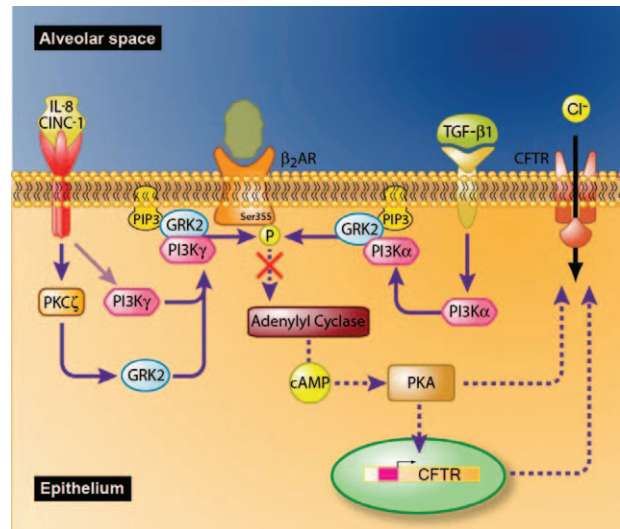

**Fig. 8.** Schematic representation of the mechanisms by which interleukin-8 (IL-8)/cytokine-induced neutrophil chemokine (CINC)-1 and transforming growth factor (TGF)- $\beta$ 1 have a synergistic inhibitory effect on the  $\beta_2$ -adrenergic receptor ( $\beta_2$ AR) signaling pathway in type II alveolar (ATII) cells. IL-8/CINC-1 and TGF- $\beta$ 1 cause the activation of different phosphoinositide 3-kinase (PI3K) isoforms. However, IL-8/CINC-1 but not TGF- $\beta$ 1 phosphorylates G-protein-coupled receptor kinase 2 (GRK2) *via* a protein kinase C- $\zeta$  (PKC- $\zeta$ )-dependent mechanism explaining why the blockade of IL-8/CINC-1 prevents the TGF- $\beta$ 1-mediated inhibition of the  $\beta_2$ AR signaling pathway in ATII cells. This results in the translocation of the protein complex GRK2 and PI3K to the cell membrane. This protein complex causes phosphorylation at the Ser355 heterologous desensitization and downregulation of the  $\beta_2$ AR in ATII cells. IL-8/CINC-1 and TGF- $\beta$ 1 then prevent the activation of 3'-5'-cyclic adenosine monophosphate (cAMP)/protein kinase A (PKA) pathway that upregulates the vectorial fluid transport across the alveolar epithelium *via* phosphorylation and increased expression of cystic fibrosis transmembrane conductance regulator (CFTR) at the plasma membrane of ATII cells. The *solid lines* indicate the pathways stimulated by IL-8/CINC-1 and the *dashed lines* indicate the pathways inhibited by these mediators.

understood but are of importance because patients with impaired AFC are at higher risk for poor outcome.<sup>3</sup> We provide in this study a new potential explanation for AFC inhibition during the early phase of ARDS, a synergistic inhibitory effect on the  $\beta_2$ AR by IL-8 and TGF- $\beta$ 1 that could be prevented, in part, by PI3K inhibitors already in clinical use for cancer therapy, inflammation, and coronary heart disease<sup>48</sup> that would be beneficial in reversing the inhibitory effect of IL-8 or TGF- $\beta$ 1 on  $\beta_2$ AR agonist-stimulated, cAMP-mediated AFC without directly antagonizing their other beneficial effects.

### Acknowledgments

The authors thank Michael A. Matthay, M.D., Cardiovascular Research Institute, and Departments of Anesthesiology and Medicine, University of California San Francisco, San Francisco, California, for giving us human type II alveolar cells.



Supported by National Institutes of Health RO1 GM086416, Bethesda, Maryland (to Dr. Pittet), and a Research Fellowship Grant from the Foundation for Anesthesia Education and Research, Rochester, Minnesota (to Dr. Wagener).

## Competing Interests

The planning, conduct, and reporting of the research were performed by Dr. Pittet and the members of his laboratory at the University of California San Francisco, San Francisco, California, and then at the University of Alabama at Birmingham, Birmingham, Alabama, with collaboration from the University of Nice-Sophia-Antipolis, Nice, France. There is no conflict of interest related to the conduct and reporting of the results by any of the authors of the present manuscript. The authors declare no competing interests.

## Correspondence

Address correspondence to Dr. Pittet: Department of Anesthesiology, University of Alabama at Birmingham, 619 South 19th Street, Jefferson Tower 926, Birmingham, Alabama 35249. [pittetj@uab.edu](mailto:pittetj@uab.edu). Information on purchasing reprints may be found at [www.anesthesiology.org](http://www.anesthesiology.org) or on the masthead page at the beginning of this issue. ANESTHESIOLOGY's articles are made freely accessible to all readers, for personal use only, 6 months from the cover date of the issue.

## References

1. Rubenfeld GD, Caldwell E, Peabody E, Weaver J, Martin DP, Neff M, Stern EJ, Hudson LD: Incidence and outcomes of acute lung injury. *N Engl J Med* 2005; 353:1685–93
2. Ware LB, Matthay MA: The acute respiratory distress syndrome. *N Engl J Med* 2000; 342:1334–49
3. Ware LB, Matthay MA: Alveolar fluid clearance is impaired in the majority of patients with acute lung injury and the acute respiratory distress syndrome. *Am J Respir Crit Care Med* 2001; 163:1376–83
4. Berthiaume Y, Staub NC, Matthay MA: Beta-adrenergic agonists increase lung liquid clearance in anesthetized sheep. *J Clin Invest* 1987; 79:335–43
5. Berthiaume Y: Effect of exogenous cAMP and aminophylline on alveolar and lung liquid clearance in anesthetized sheep. *J Appl Physiol* (1985) 1991; 70:2490–7
6. Sakuma T, Folkesson HG, Suzuki S, Okaniwa G, Fujimura S, Matthay MA: Beta-adrenergic agonist stimulated alveolar fluid clearance in *ex vivo* human and rat lungs. *Am J Respir Crit Care Med* 1997; 155:506–12
7. Sakuma T, Tsuchihara C, Ishigaki M, Osanai K, Nambu Y, Toga H, Takahashi K, Ohya N, Kurihara T, Matthay MA: Denopamine, a beta(1)-adrenergic agonist, increases alveolar fluid clearance in *ex vivo* rat and guinea pig lungs. *J Appl Physiol* (1985) 2001; 90:10–6
8. Su X, Robriquet L, Folkesson HG, Matthay MA: Protective effect of endogenous beta-adrenergic tone on lung fluid balance in acute bacterial pneumonia in mice. *Am J Physiol Lung Cell Mol Physiol* 2006; 290:L769–76
9. McAuley DF, Frank JA, Fang X, Matthay MA: Clinically relevant concentrations of beta2-adrenergic agonists stimulate maximal cyclic adenosine monophosphate-dependent airspace fluid clearance and decrease pulmonary edema in experimental acid-induced lung injury. *Crit Care Med* 2004; 32:1470–6
10. Pittet JF, Wiener-Kronish JP, McElroy MC, Folkesson HG, Matthay MA: Stimulation of lung epithelial liquid clearance by endogenous release of catecholamines in septic shock in anesthetized rats. *J Clin Invest* 1994; 94:663–71
11. Perkins GD, McAuley DF, Thickett DR, Gao F: The beta-agonist lung injury trial (BALTI): A randomized placebo-controlled clinical trial. *Am J Respir Crit Care Med* 2006; 173:281–7
12. National Heart L, and Blood Institute Acute Respiratory Distress Syndrome (ARDS) Clinical Trials Network, Matthay MA, Brower RG, Carson S, Douglas IS, Eisner M, Hite D, Holets S, Kallet RH, Liu KD, MacIntyre N, Moss M, Schoenfeld D, Steingrub J, Thompson BT: Randomized, placebo-controlled clinical trial of an aerosolized  $\beta_2$ -agonist for treatment of acute lung injury. *Am J Respir Crit Care Med* 2011; 184:561–8
13. Gao Smith F, Perkins GD, Gates S, Young D, McAuley DF, Tunnicliffe W, Khan Z, Lamb SE: Effect of intravenous beta-2 agonist treatment on clinical outcomes in acute respiratory distress syndrome (BALTI-2): A multicentre, randomised controlled trial. *Lancet* 2012; 379:229–35
14. Kunkel SL, Standiford T, Kasahara K, Strieter RM: Interleukin-8 (IL-8): The major neutrophil chemotactic factor in the lung. *Exp Lung Res* 1991; 17:17–23
15. Donnelly SC, Strieter RM, Kunkel SL, Walz A, Robertson CR, Carter DC, Grant IS, Pollok AJ, Haslett C: Interleukin-8 and development of adult respiratory distress syndrome in at-risk patient groups. *Lancet* 1993; 341:643–7
16. Kurdowska A, Miller EJ, Noble JM, Baughman RP, Matthay MA, Brelsford WG, Cohen AB: Anti-IL-8 autoantibodies in alveolar fluid from patients with the adult respiratory distress syndrome. *J Immunol* 1996; 157:2699–706
17. Miller EJ, Cohen AB, Nagao S, Griffith D, Maunder RJ, Martin TR, Weiner-Kronish JP, Sticherling M, Christophers E, Matthay MA: Elevated levels of NAP-1/interleukin-8 are present in the airspaces of patients with the adult respiratory distress syndrome and are associated with increased mortality. *Am Rev Respir Dis* 1992; 146:427–32
18. Amat M, Barcons M, Mancebo J, Mateo J, Oliver A, Mayoral JF, Fontcuberta J, Vila L: Evolution of leukotriene B<sub>4</sub>, peptide leukotrienes, and interleukin-8 plasma concentrations in patients at risk of acute respiratory distress syndrome and with acute respiratory distress syndrome: Mortality prognostic study. *Crit Care Med* 2000; 28:57–62
19. Hamacher J, Lucas R, Lijnen HR, Buschke S, Dunant Y, Wendel A, Grau GE, Suter PM, Ricou B: Tumor necrosis factor-alpha and angiostatin are mediators of endothelial cytotoxicity in bronchoalveolar lavages of patients with acute respiratory distress syndrome. *Am J Respir Crit Care Med* 2002; 166:651–6
20. Fahy RJ, Lichtenberger F, McKeegan CB, Nuovo GJ, Marsh CB, Wewers MD: The acute respiratory distress syndrome: A role for transforming growth factor-beta 1. *Am J Respir Cell Mol Biol* 2003; 28:499–503
21. Pittet JF, Griffiths MJ, Geiser T, Kaminski N, Dalton SL, Huang X, Brown LA, Gotwals PJ, Kotliansky VE, Matthay MA, Sheppard D: TGF-beta is a critical mediator of acute lung injury. *J Clin Invest* 2001; 107:1537–44
22. Hurst V IV, Goldberg PL, Minnear FL, Heimark RL, Vincent PA: Rearrangement of adherens junctions by transforming growth factor-beta1: Role of contraction. *Am J Physiol* 1999; 276(4 pt 1):L582–95
23. Roux J, McNicholas CM, Carles M, Goolaerts A, Houseman BT, Dickinson DA, Iles KE, Ware LB, Matthay MA, Pittet JF: IL-8 inhibits cAMP-stimulated alveolar epithelial fluid transport *via* a GRK2/PI3K-dependent mechanism. *FASEB J* 2013; 27:1095–106
24. Roux J, Carles M, Koh H, Goolaerts A, Ganter MT, Chesebro BB, Howard M, Houseman BT, Finkbeiner W, Shokat KM, Paquet AC, Matthay MA, Pittet JF: Transforming growth factor beta1 inhibits cystic fibrosis transmembrane conductance regulator-dependent cAMP-stimulated alveolar epithelial



- fluid transport *via* a phosphatidylinositol 3-kinase-dependent mechanism. *J Biol Chem* 2010; 285:4278–90
25. Dobbs LG, Gonzalez R, Williams MC: An improved method for isolating type II cells in high yield and purity. *Am Rev Respir Dis* 1986; 134:141–5
  26. Dobbs LG: Isolation and culture of alveolar type II cells. *Am J Physiol* 1990; 258(4 pt 1):L134–47
  27. Fang X, Song Y, Zemans R, Hirsch J, Matthay MA: Fluid transport across cultured rat alveolar epithelial cells: A novel *in vitro* system. *Am J Physiol Lung Cell Mol Physiol* 2004; 287:L104–10
  28. Tiballi RN, He X, Zarins LT, Revankar SG, Kauffman CA: Use of a colorimetric system for yeast susceptibility testing. *J Clin Microbiol* 1995; 33:915–7
  29. Pittet JF, Lu LN, Morris DG, Modelska K, Welch WJ, Carey HV, Roux J, Matthay MA: Reactive nitrogen species inhibit alveolar epithelial fluid transport after hemorrhagic shock in rats. *J Immunol* 2001; 166:6301–10
  30. Müller B, Schuetz P, Trampuz A: Circulating biomarkers as surrogates for bloodstream infections. *Int J Antimicrob Agents* 2007; 30(suppl 1):S16–23
  31. Jean-Baptiste E: Cellular mechanisms in sepsis. *J Intensive Care Med* 2007; 22:63–72
  32. Davis IC, Xu A, Gao Z, Hickman-Davis JM, Factor P, Sullender WM, Matalon S: Respiratory syncytial virus induces insensitivity to beta-adrenergic agonists in mouse lung epithelium *in vivo*. *Am J Physiol Lung Cell Mol Physiol* 2007; 293:L281–9
  33. Matthay MA, Folkesson HG, Clerici C: Lung epithelial fluid transport and the resolution of pulmonary edema. *Physiol Rev* 2002; 82:569–600
  34. Sakuma T, Gu X, Wang Z, Maeda S, Sugita M, Sagawa M, Osanai K, Toga H, Ware LB, Folkesson G, Matthay MA: Stimulation of alveolar epithelial fluid clearance in human lungs by exogenous epinephrine. *Crit Care Med* 2006; 34:676–81
  35. Laffon M, Pittet JF, Modelska K, Matthay MA, Young DM: Interleukin-8 mediates injury from smoke inhalation to both the lung endothelial and the alveolar epithelial barriers in rabbits. *Am J Respir Crit Care Med* 1999; 160(5 pt 1):1443–9
  36. Modelska K, Pittet JF, Folkesson HG, Courtney Broadbudd V, Matthay MA: Acid-induced lung injury. Protective effect of anti-interleukin-8 pretreatment on alveolar epithelial barrier function in rabbits. *Am J Respir Crit Care Med* 1999; 160(5 pt 1):1450–6
  37. De Perrot M, Sekine Y, Fischer S, Waddell TK, McRae K, Liu M, Wigle DA, Keshavjee S: Interleukin-8 release during early reperfusion predicts graft function in human lung transplantation. *Am J Respir Crit Care Med* 2002; 165:211–5
  38. Howe KL, Wang A, Hunter MM, Stanton BA, McKay DM: TGF $\beta$  down-regulation of the CFTR: A means to limit epithelial chloride secretion. *Exp Cell Res* 2004; 298:473–84
  39. Howe K, Gaudie J, McKay DM: TGF- $\beta$  effects on epithelial ion transport and barrier: Reduced Cl<sup>-</sup> secretion blocked by a p38 MAPK inhibitor. *Am J Physiol Cell Physiol* 2002; 283:C1667–74
  40. Prulière-Escabasse V, Fanen P, Dazy AC, Lechapt-Zalcman E, Rideau D, Edelman A, Escudier E, Coste A: TGF- $\beta$  1 down-regulates CFTR expression and function in nasal polyps of non-CF patients. *Am J Physiol Lung Cell Mol Physiol* 2005; 288:L77–83
  41. Nogami M, Romberger DJ, Rennard SI, Toews ML: TGF- $\beta$  1 modulates beta-adrenergic receptor number and function in cultured human tracheal smooth muscle cells. *Am J Physiol* 1994; 266(2 pt 1):L187–91
  42. Mak JC, Rousell J, Haddad EB, Barnes PJ: Transforming growth factor-beta1 inhibits beta2-adrenoceptor gene transcription. *Naunyn Schmiedeberg Arch Pharmacol* 2000; 362:520–5
  43. Naccache PH, Levasseur S, Lachance G, Chakravarti S, Bourgoin SG, McColl SR: Stimulation of human neutrophils by chemotactic factors is associated with the activation of phosphatidylinositol 3-kinase gamma. *J Biol Chem* 2000; 275:23636–41
  44. Fong YC, Hsu SF, Wu CL, Li TM, Kao ST, Tsai FJ, Chen WC, Liu SC, Wu CM, Tang CH: Transforming growth factor-beta1 increases cell migration and beta1 integrin up-regulation in human lung cancer cells. *Lung Cancer* 2009; 64:13–21
  45. Pittet JF, Brenner TJ, Modelska K, Matthay MA: Alveolar liquid clearance is increased by endogenous catecholamines in hemorrhagic shock in rats. *J Appl Physiol* (1985) 1996; 81:830–7
  46. Maron MB, Folkesson HG, Stader SM, Hodnichak CM: Impaired alveolar liquid clearance after 48-h isoproterenol infusion spontaneously recovers by 96h of continuous infusion. *Am J Physiol Lung Cell Mol Physiol* 2006; 291:L252–6
  47. Sartori C, Fang X, McGraw DW, Koch P, Snider ME, Folkesson HG, Matthay MA: Selected contribution: Long-term effects of beta(2)-adrenergic receptor stimulation on alveolar fluid clearance in mice. *J Appl Physiol* (1985) 2002; 93:1875–80
  48. Marone R, Cmiljanovic V, Giese B, Wymann MP: Targeting phosphoinositide 3-kinase: Moving towards therapy. *Biochim Biophys Acta* 2008; 1784:159–85
